# Supplementary material
Source: PubMed Central journal article supplement (PMC6399042)
Supplement: NIHMS1516632-supplement-1.pdf [file NIHMS1516632-supplement-1.pdf]

# Alterations in Systemic and Cognitive Glucocorticoid Sensitivity in Depression

## *Supplemental Information*

### **Supplemental Methods**

#### **Participant Inclusion and Exclusion Criteria**

##### *Inclusion Criteria*

- Female
- 18 to 45 years of age
- English fluency
- Able to lie still on their back for up to 90 minutes
- Willing and able to return for all visits
- Able to provide written informed consent prior to participation
- In good physical health as determined by medical history
- If a nicotine user, able to refrain from nicotine use for 2 hours prior to fMRI scanning and throughout the scan visits
- Additional criteria for never-depressed subjects: Free of current or past DSM-5 diagnoses of MDD or other depressive disorders
- Additional criteria for subjects with current or past depression: Meets DSM-5 criteria for a current or past depressive disorder diagnosis
- Adherence to home saliva collection methods and timing of sample collection

##### *Exclusion Criteria*

- Lifetime history of psychosis or mania
- Substance use disorder within the last 6 months
- Significant risk for suicide
- Claustrophobia

- Acute or chronic physical (non-psychiatric) illness
- Daily nicotine use
- Use of antidepressants, other psychotropic medication, or medications that alter glucocorticoids
- Hormonal contraceptives
- Peri- or postmenopausal signs
- Highly irregular periods
- Pregnancy or breastfeeding within the last 6 months
- Illicit drug use within the last 4 weeks (verified by negative urinary drug test)

### **Additional Methods for Home Saliva Collection**

In addition to detailed instructions, participants received a phone or text reminder to begin saliva collection on Day 1 and to take the dexamethasone pill on Day 3. Adherence to the saliva collection protocol was monitored with Medication Event Monitoring System (MEMS) 6 TrackCaps (AARDEX Group Ltd., Sion, Switzerland), which recorded a timestamp when each Salivette was removed from a container for collection. Additionally, participants completed a Home Saliva Collection Log each time they provided a sample, which asked them to record the time of collection, sleep diary information, and information about naps, exercise, illnesses, allergies, menstrual cycle, emotional/stressful events, medications, caffeine use, food/beverage intake, and drug/alcohol use.

### **Null Effects of Menstrual Cycle Phase**

Menstrual cycle phase did not moderate findings reported in the body of the article: Menstrual phase was not related to dexamethasone suppression test (DST) feedback sensitivity or memory bias, either for cortisol administration (CORT) or placebo,  $p$ 's > 0.32. Depression

severity remains a significant predictor of DST feedback sensitivity when menstrual cycle phase is included in the model,  $F(1,48) = 6.23$ ,  $p = 0.016$ . In addition, the relation between DST feedback sensitivity and memory bias for pictures encoded during placebo remains when menstrual phase is included in the model,  $F(1,61) = 4.07$ ,  $p = 0.048$ . Most importantly, the relation remains between DST feedback sensitivity and reduction in memory bias for pictures encoded during CORT (vs. placebo),  $F(1,61) = 7.25$ ,  $p = 0.009$ . It should be noted, however, that the current study is not the ideal test of the potential role of menstrual cycle phase in cortisol sensitivity, because menstrual phase varied for the different segments of the study, and timing with respect to menstrual phase was not controlled.

**Table S1. DSM-5 Diagnoses for Each Participant by Depression Group**Table S1a. Depression Group: **Never Depressed**

| <b>Participant</b> | <b>Depressive Disorder Diagnoses</b> | <b>Other Current Diagnoses</b>            |
|--------------------|--------------------------------------|-------------------------------------------|
| 1                  | None                                 | None                                      |
| 2                  | None                                 | None                                      |
| 3                  | None                                 | None                                      |
| 4                  | None                                 | None                                      |
| 5                  | None                                 | None                                      |
| 6                  | None                                 | None                                      |
| 7                  | None                                 | None                                      |
| 8                  | None                                 | None                                      |
| 9                  | None                                 | None                                      |
| 10                 | None                                 | None                                      |
| 11                 | None                                 | None                                      |
| 12                 | None                                 | None                                      |
| 13                 | None                                 | None                                      |
| 14                 | None                                 | None                                      |
| 15                 | None                                 | None                                      |
| 16                 | None                                 | None                                      |
| 17                 | None                                 | None                                      |
| 18                 | None                                 | None                                      |
| 19                 | None                                 | Social Anxiety Disorder, Performance Only |
| 20                 | None                                 | None                                      |
| 21                 | None                                 | None                                      |
| 22                 | None                                 | None                                      |
| 23                 | None                                 | None                                      |
| 24                 | None                                 | None                                      |
| 25                 | None                                 | None                                      |
| 26                 | None                                 | None                                      |

Table S1b. Depression Group: **Other Depression**

| <b>Participant</b> | <b>Depressive Disorder Diagnoses</b>                                                                                                 | <b>Other Current Diagnoses</b>                                                                                |
|--------------------|--------------------------------------------------------------------------------------------------------------------------------------|---------------------------------------------------------------------------------------------------------------|
| 1                  | Major Depressive Disorder, Single Episode, In Full Remission                                                                         | Specific Phobia, Animal                                                                                       |
| 2                  | Major Depressive Disorder, Single Episode, In Full Remission                                                                         | None                                                                                                          |
| 3                  | Major Depressive Disorder, Recurrent Episode, In Full Remission                                                                      | None                                                                                                          |
| 4                  | Persistent Depressive Disorder, Early Onset, With Intermittent Major Depressive Episodes, Without Current Episode, Moderate          | Social Anxiety Disorder                                                                                       |
| 5                  | Other Specified Depressive Disorder (Depressive episode with insufficient symptoms)                                                  | Generalized Anxiety Disorder<br>Posttraumatic Stress Disorder, With Dissociative Symptoms (Depersonalization) |
| 6                  | Major Depressive Disorder, Recurrent Episode, In Full Remission                                                                      | None                                                                                                          |
| 7                  | Persistent Depressive Disorder, Early Onset, With Intermittent Major Depressive Episodes, Without Current Episode, Mild              | Social Anxiety Disorder                                                                                       |
| 8                  | Persistent Depressive Disorder, In Full Remission, Early Onset, With Intermittent Major Depressive Episodes, Without Current Episode | None                                                                                                          |
| 9                  | Major Depressive Disorder, Single Episode, In Full Remission                                                                         | None                                                                                                          |
| 10                 | Persistent Depressive Disorder, In Full Remission, With Intermittent Major Depressive Episodes, Without Current Episode              | None                                                                                                          |
| 11                 | Major Depressive Disorder, Recurrent Episode, In Partial Remission                                                                   | Social Anxiety Disorder                                                                                       |
| 12                 | Persistent Depressive Disorder, In Full Remission, With Intermittent Major Depressive Episodes, Without Current Episode              | Social Anxiety Disorder<br>Binge-Eating Disorder, In Partial Remission                                        |
| 13                 | Major Depressive Disorder, Recurrent Episode, In Partial Remission, With Seasonal Pattern                                            | None                                                                                                          |

| <b>Participant</b> | <b>Depressive Disorder Diagnoses</b>                                                                                                                        | <b>Other Current Diagnoses</b>                                |
|--------------------|-------------------------------------------------------------------------------------------------------------------------------------------------------------|---------------------------------------------------------------|
| 14                 | Persistent Depressive Disorder, With Anxious Distress, In Partial Remission, Early Onset, With Intermittent Depressive Episodes, Without Current Episode    | Social Anxiety Disorder                                       |
| 15                 | Major Depressive Disorder, Recurrent Episode, In Full Remission, With Anxious Distress                                                                      | None                                                          |
| 16                 | Persistent Depressive Disorder, With Anxious Distress, In Full Remission, Early Onset, With Intermittent Major Depressive Episodes, Without Current Episode | None                                                          |
| 17                 | Major Depressive Disorder, Recurrent Episode, In Full Remission, With Anxious Distress                                                                      | None                                                          |
| 18                 | Major Depressive Disorder, Recurrent Episode, In Full Remission                                                                                             | None                                                          |
| 19                 | Other Specified Depressive Disorder (Depressive episode with insufficient symptoms)                                                                         | None                                                          |
| 20                 | Major Depressive Disorder, Recurrent Episode, In Partial Remission                                                                                          | None                                                          |
| 21                 | Major Depressive Disorder, Recurrent Episode, In Partial Remission                                                                                          | Generalized Anxiety Disorder<br>Posttraumatic Stress Disorder |
| 22                 | Persistent Depressive Disorder, With Intermittent Major Depressive Episodes, Without Current Episode, Moderate                                              | None                                                          |
| 23                 | Other Specified Depressive Disorder (Short-duration depressive episode)                                                                                     | None                                                          |
| 24                 | Major Depressive Disorder, Recurrent Episode, In Partial Remission                                                                                          | Social Anxiety Disorder                                       |

Table S1c. Depression Group: **Current MDD**

| <b>Participant</b> | <b>Depressive Disorder Diagnoses</b>                                                                                     | <b>Other Current Diagnoses</b>                                                                                                                     |
|--------------------|--------------------------------------------------------------------------------------------------------------------------|----------------------------------------------------------------------------------------------------------------------------------------------------|
| 1                  | Persistent Depressive Disorder, Early Onset, With Intermittent Major Depressive Episodes, With Current Episode, Mild     | Posttraumatic Stress Disorder, With Dissociative Symptoms                                                                                          |
| 2                  | Major Depressive Disorder, Recurrent Episode, Moderate                                                                   | Social Anxiety Disorder<br>Generalized Anxiety Disorder                                                                                            |
| 3                  | Persistent Depressive Disorder, Early Onset, With Intermittent Major Depressive Episodes, With Current Episode, Moderate | Social Anxiety Disorder<br>Binge-Eating Disorder, Mild                                                                                             |
| 4                  | Persistent Depressive Disorder, Early Onset, With Intermittent Major Depressive Episodes, With Current Episode, Moderate | None                                                                                                                                               |
| 5                  | Major Depressive Disorder, Recurrent Episode, Moderate                                                                   | Social Anxiety Disorder, Performance Only<br>Binge-Eating Disorder, In Partial Remission                                                           |
| 6                  | Major Depressive Disorder, Single Episode, Mild, With Anxious Distress                                                   | Specific Phobia, Animal<br>Social Anxiety Disorder                                                                                                 |
| 7                  | Major Depressive Disorder, Recurrent Episode, Moderate                                                                   | Social Anxiety Disorder<br>Agoraphobia with Panic Attacks                                                                                          |
| 8                  | Major Depressive Disorder, Recurrent Episode, Severe, With Anxious Distress, With Seasonal Pattern                       | Social Anxiety Disorder                                                                                                                            |
| 9                  | Persistent Depressive Disorder, Early Onset, With Persistent Major Depressive Episode, Moderate                          | Social Anxiety Disorder<br>Specific Phobia, Blood-Injection-Injury<br>Posttraumatic Stress Disorder with Panic Attacks, With Dissociative Symptoms |
| 10                 | Persistent Depressive Disorder, With Intermittent Major Depressive Episodes, With Current Episode, Moderate              | None                                                                                                                                               |
| 11                 | Major Depressive Disorder, Recurrent Episode, Moderate                                                                   | Generalized Anxiety Disorder with Panic Attacks<br>Social Anxiety Disorder                                                                         |
| 12                 | Persistent Depressive Disorder, With Anxious Distress, Early Onset, With Persistent Major Depressive Episode, Moderate   | Social Anxiety Disorder<br>Posttraumatic Stress Disorder with Panic Attacks                                                                        |
| 13                 | Major Depressive Disorder, Recurrent Episode, Moderate                                                                   | Specific Phobia, Natural Environment                                                                                                               |

| <b>Participant</b> | <b>Depressive Disorder Diagnoses</b>                                                                      | <b>Other Current Diagnoses</b>                                                                                                                            |
|--------------------|-----------------------------------------------------------------------------------------------------------|-----------------------------------------------------------------------------------------------------------------------------------------------------------|
| 14                 | Persistent Depressive Disorder, With Anxious Distress, With Persistent Major Depressive Episode, Moderate | Generalized Anxiety Disorder<br>Obsessive Compulsive Disorder, With Good Insight<br>Specific Phobia, Natural Environment<br>Posttraumatic Stress Disorder |
| 15                 | Major Depressive Disorder, Recurrent Episode, Moderate, With Anxious Distress                             | Bulimia Nervosa, In Partial Remission                                                                                                                     |



**Table S2. Pictures Presented During Memory Encoding from the International Affective Picture System (IAPS) (1).** These picture sets are psychometrically matched on affective valence (i.e., pleasantness) and arousal with minimal content overlap to support testing of memory formation in a repeated measures design.

| Set A |      |      |      |
|-------|------|------|------|
| 1202  | 3150 | 7040 | 8312 |
| 1340  | 3170 | 7057 | 8380 |
| 1670  | 3195 | 7090 | 8492 |
| 1710  | 4597 | 7130 | 8496 |
| 1720  | 4612 | 7175 | 8502 |
| 1999  | 5215 | 7217 | 9008 |
| 2102  | 5450 | 7224 | 9210 |
| 2205  | 5534 | 7230 | 9250 |
| 2300  | 5629 | 7234 | 9300 |
| 2310  | 5731 | 7300 | 9342 |
| 2347  | 5829 | 7400 | 9415 |
| 2357  | 5910 | 7405 | 9421 |
| 2393  | 6020 | 7491 | 9429 |
| 2397  | 6241 | 7501 | 9440 |
| 2411  | 6563 | 7508 | 9471 |
| 2456  | 6838 | 7700 | 9561 |
| 2518  | 7001 | 8090 | 9599 |
| 2688  | 7002 | 8185 | 9620 |
| 2692  | 7026 | 8200 | 9810 |
| 2840  | 7034 | 8280 | 9902 |
| 3063  | 7037 | 8300 | 9927 |

| Set B |        |      |      |
|-------|--------|------|------|
| 1111  | 2890   | 7050 | 8186 |
| 1463  | 2900.1 | 7060 | 8370 |
| 1650  | 3019   | 7100 | 8460 |
| 1811  | 3062   | 7140 | 8497 |
| 2045  | 3160   | 7205 | 8531 |
| 2154  | 3261   | 7233 | 9040 |
| 2156  | 4624   | 7255 | 9186 |
| 2191  | 5301   | 7330 | 9187 |
| 2216  | 5460   | 7350 | 9220 |
| 2221  | 5471   | 7359 | 9404 |
| 2272  | 5833   | 7451 | 9409 |
| 2377  | 5971   | 7470 | 9413 |
| 2384  | 6150   | 7502 | 9426 |
| 2396  | 6250   | 7650 | 9435 |
| 2480  | 6415   | 7710 | 9470 |
| 2550  | 7000   | 7950 | 9520 |
| 2593  | 7010   | 8001 | 9560 |
| 2595  | 7019   | 8030 | 9611 |
| 2694  | 7020   | 8116 | 9800 |
| 2710  | 7038   | 8163 | 9832 |
| 2880  | 7045   | 8180 | 9922 |

**Table S3. Raw Cortisol Levels (in  $\mu\text{g/dL}$ ) for Samples Collected at Home Before and After Dexamethasone Administration by Group**Table S3a. Depression Group: **Never Depressed**

| Participant | Pre-Dexamethasone Cortisol Levels for the Morning Peak Sample (averaged across Days 1-3) | Post-Dexamethasone Cortisol Levels for the Morning Peak Sample on Day 4 |
|-------------|------------------------------------------------------------------------------------------|-------------------------------------------------------------------------|
| 1           | 0.440                                                                                    | 1.023                                                                   |
| 2           | 0.514                                                                                    | 0.832                                                                   |
| 3           | 0.376                                                                                    | 0.793                                                                   |
| 4           | 0.314                                                                                    | 0.918                                                                   |
| 5           | 1.072                                                                                    | 1.097                                                                   |
| 6           | 0.930                                                                                    | 0.969                                                                   |
| 7           | 0.341                                                                                    | 0.613                                                                   |
| 8           | 0.174                                                                                    | 0.634                                                                   |
| 9           | 0.209                                                                                    | 0.632                                                                   |
| 10          | 0.213                                                                                    | 0.590                                                                   |
| 11          | 0.207                                                                                    | 0.579                                                                   |
| 12          | 0.291                                                                                    | 0.315                                                                   |
| 13          | 0.252                                                                                    | 0.317                                                                   |
| 14          | 0.079                                                                                    | 0.304                                                                   |
| 15          | 0.031                                                                                    | 0.414                                                                   |
| 16          | 0.227                                                                                    | 0.607                                                                   |
| 17          | 0.061                                                                                    | 0.325                                                                   |
| 18          | 0.242                                                                                    | 0.383                                                                   |
| 19          | 0.155                                                                                    | 0.269                                                                   |
| 20          | 0.322                                                                                    | 0.726                                                                   |
| 21          | 0.062                                                                                    | 0.276                                                                   |
| 22          | 0.090                                                                                    | 0.699                                                                   |
| 23          | 0.086                                                                                    | 0.469                                                                   |
| 24          | 0.443                                                                                    | 0.624                                                                   |
| 25          | 0.562                                                                                    | 0.537                                                                   |
| 26          | 0.192                                                                                    | 0.737                                                                   |

Table S3b. Depression Group: **Other Depression**

| <b>Participant</b> | <b>Pre-Dexamethasone<br/>Cortisol Levels for the<br/>Morning Peak Sample<br/>(averaged across<br/>Days 1-3)</b> | <b>Post-Dexamethasone<br/>Cortisol Levels for the<br/>Morning Peak Sample<br/>on Day 4</b> |
|--------------------|-----------------------------------------------------------------------------------------------------------------|--------------------------------------------------------------------------------------------|
| 1                  | 0.542                                                                                                           | 0.836                                                                                      |
| 2                  | 0.323                                                                                                           | 0.482                                                                                      |
| 3                  | 0.054                                                                                                           | 0.264                                                                                      |
| 4                  | 0.494                                                                                                           | 0.812                                                                                      |
| 5                  | 0.045                                                                                                           | 0.548                                                                                      |
| 6                  | 0.101                                                                                                           | 0.310                                                                                      |
| 7                  | 0.379                                                                                                           | 0.473                                                                                      |
| 8                  | 0.022                                                                                                           | 0.389                                                                                      |
| 9                  | 0.027                                                                                                           | 0.206                                                                                      |
| 10                 | 0.687                                                                                                           | 0.906                                                                                      |
| 11                 | 0.723                                                                                                           | 0.696                                                                                      |
| 12                 | 0.076                                                                                                           | 0.275                                                                                      |
| 13                 | 0.028                                                                                                           | 0.275                                                                                      |
| 14                 | 0.684                                                                                                           | 0.759                                                                                      |
| 15                 | 0.605                                                                                                           | 1.209                                                                                      |
| 16                 | 0.083                                                                                                           | 0.502                                                                                      |
| 17                 | 0.307                                                                                                           | 0.475                                                                                      |
| 18                 | 0.509                                                                                                           | 0.823                                                                                      |
| 19                 | 0.219                                                                                                           | 0.590                                                                                      |
| 20                 | 0.338                                                                                                           | 0.342                                                                                      |
| 21                 | 0.015                                                                                                           | 0.302                                                                                      |
| 22                 | 0.052                                                                                                           | 0.547                                                                                      |
| 23                 | 0.336                                                                                                           | 1.088                                                                                      |
| 24                 | 0.352                                                                                                           | 0.792                                                                                      |

Table S3c. Depression Group: **Current MDD**

| <b>Participant</b> | <b>Pre-Dexamethasone<br/>Cortisol Levels for the<br/>Morning Peak Sample<br/>(averaged across<br/>Days 1-3)</b> | <b>Post-Dexamethasone<br/>Cortisol Levels for the<br/>Morning Peak Sample<br/>on Day 4</b> |
|--------------------|-----------------------------------------------------------------------------------------------------------------|--------------------------------------------------------------------------------------------|
| 1                  | 0.269                                                                                                           | 0.780                                                                                      |
| 2                  | 0.895                                                                                                           | 0.865                                                                                      |
| 3                  | 0.048                                                                                                           | 0.213                                                                                      |
| 4                  | 0.161                                                                                                           | 0.239                                                                                      |
| 5                  | 0.228                                                                                                           | 0.351                                                                                      |
| 6                  | 0.001                                                                                                           | 0.322                                                                                      |
| 7                  | 0.293                                                                                                           | 0.412                                                                                      |
| 8                  | 0.674                                                                                                           | 0.653                                                                                      |
| 9                  | 0.387                                                                                                           | 0.992                                                                                      |
| 10                 | 1.065                                                                                                           | 0.824                                                                                      |
| 11                 | 0.426                                                                                                           | 0.743                                                                                      |
| 12                 | 0.685                                                                                                           | 0.472                                                                                      |
| 13                 | 0.451                                                                                                           | 0.563                                                                                      |
| 14                 | 0.007                                                                                                           | 0.306                                                                                      |
| 15                 | 0.716                                                                                                           | 0.817                                                                                      |

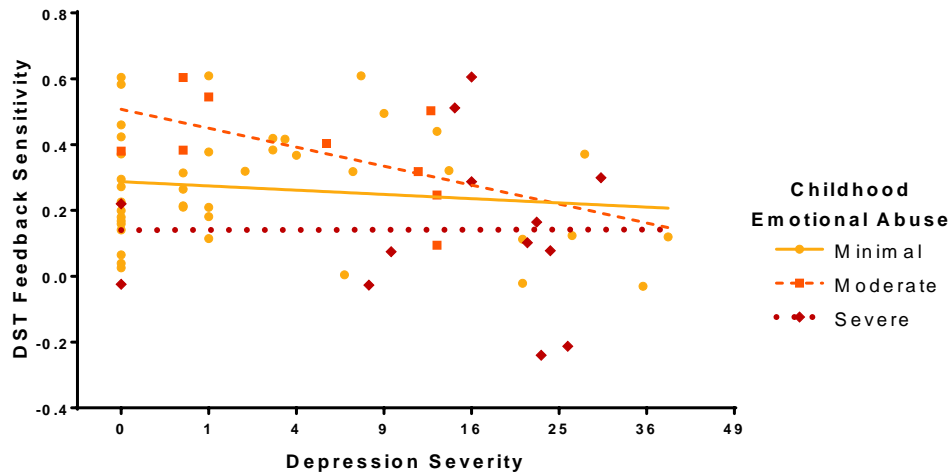

**Figure S1. Scatter Plot Illustrating Relations Among Childhood Emotional Abuse (EA), Depression Severity, and Dexamethasone Suppression Test (DST) Feedback Sensitivity**

Regression slopes shown in color (see legend) are based on Childhood Trauma Questionnaire (CTQ) Emotional Abuse (EA) groups. When both EA and depression severity were included in the model predicting DST feedback sensitivity, there was a marginal association between EA and feedback sensitivity,  $F(2,59) = 2.84$ ,  $p = 0.07$ , with a relative pattern of severe EA associated with reduced feedback sensitivity and moderate EA associated with enhanced feedback sensitivity relative to minimal EA (illustrated in figure). Despite the appearance of an interaction with depression severity in the plot, the interaction between EA and depression severity was not significant,  $F(2,59) = 0.63$ , *n.s.* These findings may suggest that history of severe early adverse caregiving is related to feedback sensitivity across the continuum of depression severity, which as described in the main text of the article, is also associated with reduced feedback sensitivity. Both severe depression and severe EA appear to be associated with reduced feedback sensitivity. In addition, our findings may suggest that moderate EA is associated with enhanced feedback sensitivity, but our sample size of women with moderate EA ( $n = 9$ ) is too small to draw a firm conclusion. For display purposes, Beck Depression Inventory II (BDI-II) scores are square-root transformed to reduce skew and back-transformed to maintain the original BDI-II score range as done in previous research (2,3). We also ran the analyses with CTQ total scores. When we use CTQ-total score (either the continuous score or categorical groups based on validated cut-offs) no new findings emerge and the marginal association with DST feedback sensitivity disappears,  $p$ 's  $> 0.19$ .

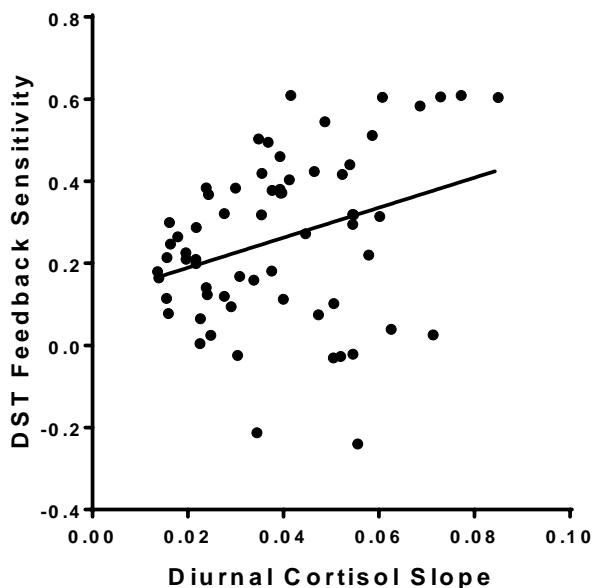

**Figure S2. Scatter Plot Illustrating Relations Among Dexamethasone Suppression Test (DST) Feedback Sensitivity and Diurnal Cortisol Slope Across All Participants**

Diurnal cortisol slope was computed as reported by Jarcho et al. (4), in which slope was the absolute value of the change in cortisol levels from the morning peak sample to the 10 PM sample divided by the time between the two samples, averaged across Days 1-3. Higher numbers indicate a steeper diurnal cortisol slope. When collapsing across depression and emotional abuse (EA) groups, diurnal cortisol slope and DST feedback sensitivity were positively correlated,  $r(64) = 0.32$ ,  $p = 0.01$ , such that steeper decline of cortisol throughout the day was related to greater feedback sensitivity (i.e., more DST suppression). When including EA and depression severity in the model, diurnal cortisol slope remained a significant predictor of DST feedback sensitivity,  $F(1,53) = 7.87$ ,  $p = 0.007$  and did not interact with either EA or depression severity,  $p$ 's  $> 0.12$ .

**Supplemental References**

1. Lang PJ, Bradley MM, Cuthbert BN (2008): *International affective picture system (IAPS): Affective ratings of pictures and instruction manual. Technical Report A-8*. Gainesville, FL: University of Florida.
2. Roelofs J, van Breukelen G, de Graaf LE, Beck AT, Arntz A, Huibers MJH (2013): Norms for the Beck Depression Inventory (BDI-II) in a large Dutch community sample. *J Psychopathol Behav* 35: 93-98.
3. van Minnen A, Wessel I, Verhaak C, Smeenk J (2005): The relationship between autobiographical memory specificity and depressed mood following a stressful life event: a prospective study. *The British journal of clinical psychology / the British Psychological Society* 44: 405-415.
4. Jarcho MR, Slavich GM, Tylova-Stein H, Wolkowitz OM, Burke HM (2013): Dysregulated diurnal cortisol pattern is associated with glucocorticoid resistance in women with major depressive disorder. *Biol Psychol* 93: 150-158.
